# Supplementary material for: Soluble tumor necrosis factor receptors are associated with severity of kidney dysfunction in pediatric chronic kidney disease
Source: Springer Nature journal article supplement (doi:10.1007/s00467-018-4124-y), 2018-10-29
Supplement: MOESM1 [file 16234102]

**Supplementary Material**

**Table 1-** Clinical characteristics, etiology of chronic kidney disease (CKD), CKD stages and laboratory values of children and adolescents with CKD (n = 34).

|  | **Mean**±S**D (minimum and maximum values)** | **Number of cases**  **(percentage)** |
| --- | --- | --- |
| Age | 13.4±2.2 (9-17) |  |
| Disease duration (years) | 11.9±3.3 (5-17) |  |
| Treatment duration (years) | 11.3±3.4 (4-15) |  |
| Presence of clinical comorbidities |  | 6 (17.6) |
| **CKD ethiology: n (%)** |  |  |
| CAKUT |  | 16 (47) |
| Glomerular disease |  | 7 (20.5) |
| Cystic disease |  | 4 (11.7) |
| Others |  | 7 (20.5) |
| **CKD Classification: n(%)** |  |  |
| Stage 2 |  | 5 (14.7) |
| Stage 3 |  | 12 (35.3) |
| Stage 4 |  | 6 (17.6) |
| Stage 5 |  | 11 (32.4) |
| **Laboratory values** |  |  |
| Creatinine (mg/dl) | 2.3±1.5 (0.4–8.7) |  |
| Urea (mg/dl) | 84.6 ±47.8 (24-186) |  |
| Total calcium (mg/dl) | 9.4±0.8 (7.3–10.8) |  |
| Parathormone (pg/ml) | 246.2±281.8 (16-1291) |  |
| pH | 7.32±0.06 (7.13-7.45) |  |
| Hemoglobin (g/dl) | 11.1±2.3 (7.1-15.3) |  |
| Uric acid (mg/dl) | 6.8 ±1.4 (4.4-9.6) |  |
| Total cholesterol (mg/dl) | 160.4 ±30.7 (107-211) |  |
| Low-density lipoprotein (mg/dl) | 84.5±30.1 (40-139) |  |
| High-density lipoprotein (mg/dl) | 52.5±24 (24-105) |  |
| Triglycerides (mg/dl) | 118±65.2 (42-261) |  |

SD: standard deviation. eGFR calculated by Modified Schwartz formula: 0.413x height (cm)**/** serum creatinine (mg/dL) (12).
